27 **Acknowledgements:**

28 This work was supported by National Institute on Deafness and Other Communication Disorders  
29 (NIDCD) grant R01 DC016622, by the Intelligence Advanced Research Projects Activity under  
30 Grant FA8650-14-C-7357, and by a grant from the Advancing a Healthier Wisconsin Foundation  
31 (Project #5520462). The authors thank Volkan Arpinar, Elizabeth Awe, Joseph Heffernan,  
32 Steven Jankowski, Jedidiah Mathis, and Megan LeDoux for technical assistance.

33

34

35

36

37

38

39

40

41

42

43

44

45 **Abstract**

46 The architecture of the cortical system underlying concept representation is a topic of intense  
47 debate. Much evidence supports the claim that concept retrieval selectively engages sensory,  
48 motor, and other neural systems involved in the acquisition of the retrieved concept, yet there is  
49 also strong evidence for involvement of high-level, supramodal cortical regions. A fundamental  
50 question about the organization of this system is whether modality-specific information  
51 originating from sensory and motor areas is integrated across multiple “convergence zones” or  
52 in a single centralized “hub”. We used representational similarity analysis (RSA) of fMRI data to  
53 map brain regions where the similarity structure of neural patterns elicited by large sets of  
54 concepts matched the similarity structure predicted by a high-dimensional model of concept  
55 representation based on sensory, motor, affective, and other modal aspects of experience.  
56 Across two studies involving different sets of concepts, different participants, and different tasks,  
57 searchlight RSA revealed a distributed, bihemispheric network engaged in multimodal  
58 experiential representation, composed of high-level association cortex in anterior, lateral, and  
59 ventral temporal lobe; inferior parietal lobule; posterior cingulate gyrus and precuneus; and  
60 medial, dorsal, ventrolateral, and orbital prefrontal cortex. These regions closely resemble  
61 networks previously implicated in general semantic and “default mode” processing and are  
62 known to be high-level hubs for convergence of multimodal processing streams. Supplemented  
63 by an exploratory cluster analysis, these results indicate that the concept representation system  
64 consists of multiple, hierarchically organized convergence zones supporting multimodal  
65 integration of experiential information.

66

67 **Significance Statement**

68 It has long been known that information about visual, auditory, motor, affective, and other  
69 features of our phenomenal experience originate in distinct brain regions. However, it is still  
70 unclear how these processing streams converge to form multimodal concept representations.

71 Using fMRI together with a multimodal experiential model of conceptual content, we show in two  
72 large studies that concept knowledge is represented across a distributed, bihemispheric network  
73 including temporal, parietal, limbic, and prefrontal association cortices. These results argue  
74 against the idea of a single centralized “hub” for concept representation, suggesting instead that  
75 multiple high-level convergence zones encode conceptual information in terms of multimodal  
76 experiential content.

77

## 78 **Introduction**

79 Concepts are the building blocks of meaning and are essential for everyday thinking, planning,  
80 and communication, yet there remains considerable debate surrounding their neural  
81 implementation. “Grounded” theories of concept representation postulate that sensory-motor  
82 and affective representations involved in concept formation are re-activated during concept  
83 retrieval (Damasio, 1989; Barsalou, 2008; Glenberg et al., 2009). Support for this claim includes  
84 many studies showing that perceptual and motor processing areas are activated when  
85 corresponding perceptual or motor information about concepts is retrieved (Meteyard and  
86 Vigliocco, 2008; Binder and Desai, 2011; Kiefer and Pulvermuller, 2012; Kemmerer, 2014).

87 How these multiple modality-specific representations are combined during concept  
88 retrieval, however, is not yet clear. Primate cortex contains multiple regions where information  
89 converges across sensory modalities (Jones and Powell, 1970; Mesulam, 1998; Man et al.,  
90 2013; Man et al., 2015). Portions of the human superior temporal sulcus (STS), for example, are  
91 known to respond to tactile, auditory, and visual stimulation (Beauchamp et al., 2008). The  
92 homolog of this region in macaque monkeys contains neurons that similarly respond to any of  
93 these stimulation modalities (Bruce et al., 1981) and are anatomically connected to  
94 corresponding unimodal cortex (Padberg et al., 2003). Other primate brain areas reported to  
95 have multimodal characteristics include posterior parietal cortex (Andersen, 1997), prefrontal  
96 cortex (Sugihara et al., 2006), parahippocampus (Damasio et al., 1982), and entorhinal cortex

97 (Van Hoesen et al., 1972). Possible human homologs of these regions include cortical areas  
98 identified with the “default mode network”, as suggested by a step-wise connectivity analysis of  
99 resting-state fMRI (Sepulcre et al., 2012). Beginning with seed regions in multiple primary  
100 sensory cortices, these authors showed that connections arising from these regions gradually  
101 converge, over multiple connectivity steps, at high-level “hubs” that include much of the lateral  
102 temporal cortex, angular gyrus, dorsomedial and inferolateral prefrontal cortex, posterior  
103 cingulate gyrus and precuneus.

104 Various models propose a central role for multimodal or supramodal hubs in concept  
105 processing, though both the anatomical location and information content encoded in these hubs  
106 remain unclear (Mahon and Caramazza, 2008; Binder and Desai, 2011; Lambon Ralph et al.,  
107 2017). One prominent theory proposes that the anterior temporal lobe (ATL) plays a unique role  
108 in storing abstract concept representations. During concept retrieval, the central ATL hub would  
109 activate modality-specific representations stored in unimodal cortical areas (the “spokes”)  
110 (Patterson et al., 2007). An alternative model postulates widespread and hierarchically  
111 organized convergence zones in multiple brain locations (Damasio, 1989; Mesulam, 1998;  
112 Meyer and Damasio, 2009). We have previously proposed that these convergence zones are  
113 neurally implemented in the multimodal connectivity hubs identified by Sepulcre et al. (2012),  
114 which closely correspond to the regions identified in a large neuroimaging meta-analysis of  
115 semantic word processing (Binder et al., 2009). This idea is supported by neuroimaging findings  
116 indicating that these cortical regions encode multimodal information about the experiential  
117 content of lexical concepts (Bonner et al., 2013; Fernandino et al., 2016b; Fernandino et al.,  
118 2016a; Fernandino et al., 2021).

119 Here we use representational similarity analysis (RSA) with a whole-brain searchlight  
120 approach to identify cortical regions involved in multimodal conceptual representation. RSA  
121 measures the level of correspondence between the similarity matrix for a set of stimuli (e.g.,  
122 words) derived from neural data and the similarity matrix for the same stimulus set computed

123 from an *a priori* representational model (Kriegeskorte et al., 2008). We used a searchlight  
124 approach (Kriegeskorte et al., 2008) to generate a map of cortical regions where this  
125 representational correspondence holds true. We used an experiential model of conceptual  
126 content as the basis for RSA (Binder et al., 2016). Unlike the abstract representations used in  
127 previous RSA studies, this model encodes conceptual content explicitly in terms of 65 sensory,  
128 motor, affective, and other experiential processes. Identical analyses were run on two large  
129 datasets to assess replication across independent participant samples, word sets, and tasks.  
130 The analyses provided strong evidence that the multimodal experiential content of lexical  
131 concepts is represented across several high-level convergence zones.

132

## 133 **Material and Methods**

### 134 **Experiment 1**

#### 135 *Participants*

136 Nineteen native English speakers (11 women, 8 men) participated in Experiment 1. Their mean  
137 age was 26.4 years (range 20 to 38). All were right-handed according to the Edinburgh  
138 handedness inventory (Oldfield, 1971) and had no history of neurological disease. All  
139 participants in Experiments 1 and 2 were compensated for their time and gave informed consent  
140 in conformity with a protocol approved by the Institutional Review Board of the Medical College  
141 of Wisconsin.

142

#### 143 *Stimuli and Concept Features*

144 The stimuli consisted of 242 words, including 141 nouns, 62 verbs, and 39 adjectives  
145 (Supplementary Table 1). The noun concepts included inanimate objects, animate objects,  
146 human roles (e.g., mother, doctor), settings (e.g., church, forest), and events. Stimuli were  
147 selected by the Intelligence Advanced Research Projects Activity, which funded the study.  
148 Experiential representations for these words were available from a previous study in which

149 ratings on 65 experiential domains were used to represent word meanings in a high-dimensional  
150 space (Binder et al., 2016). In brief, the experiential domains were selected based on known  
151 neural processing systems – such as color, shape, visual motion, touch, audition, motor control,  
152 olfaction – as well as other fundamental aspects of cognition whose neural substrates are less  
153 clearly understood, such as space, time, affect, reward, numerosity, and others. Ratings were  
154 collected using the crowd sourcing tool Amazon Mechanical Turk, in which volunteers rated the  
155 relevance of each experiential domain to a given concept on a 0-6 Likert scale. The value of  
156 each feature was represented by averaging ratings across participants. This feature set was  
157 highly effective at clustering concepts into traditional taxonomic categories (e.g., animals,  
158 plants, vehicles, occupations, etc.) (Binder et al., 2016) and has been used successfully to  
159 decode fMRI activation patterns during sentence reading (Anderson et al., 2017; Anderson et  
160 al., 2019).

161

### 162 *Stimulus Presentation and Tasks*

163 Words were presented visually in a fast event-related procedure with variable inter-stimulus  
164 intervals. The entire list was presented to each participant six times in a different pseudorandom  
165 order across two separate imaging sessions (3 presentations per session).

166 Stimuli were presented in white font on a black background. Each trial began with  
167 presentation of a single word for 500 ms, followed by a 1.5-sec fixation period (**Figure 1**).  
168 Participants were instructed to read each word silently and think about the meaning of the word.  
169 To ensure attention to the stimuli, a random 10% of the trials were followed by a semantic-  
170 matching probe task, in which 2 words were shown side by side, and the participant indicated by  
171 a button press which of the two was more similar in meaning to the word just presented (these  
172 probe trials were not included in the analyses). All trials then concluded with presentation of a  
173 nonverbal “reset” stimulus for 1.5 seconds, the aim of which was to suppress processing of the  
174 previously presented word. The reset stimulus consisted of two grey squares presented side by

175 side and separated by a vertical black line. The participant indicated by a button press which of  
176 the two squares was brighter. A variable fixation period of 0-4 sec followed all trials prior to the  
177 beginning of the next trial.

178

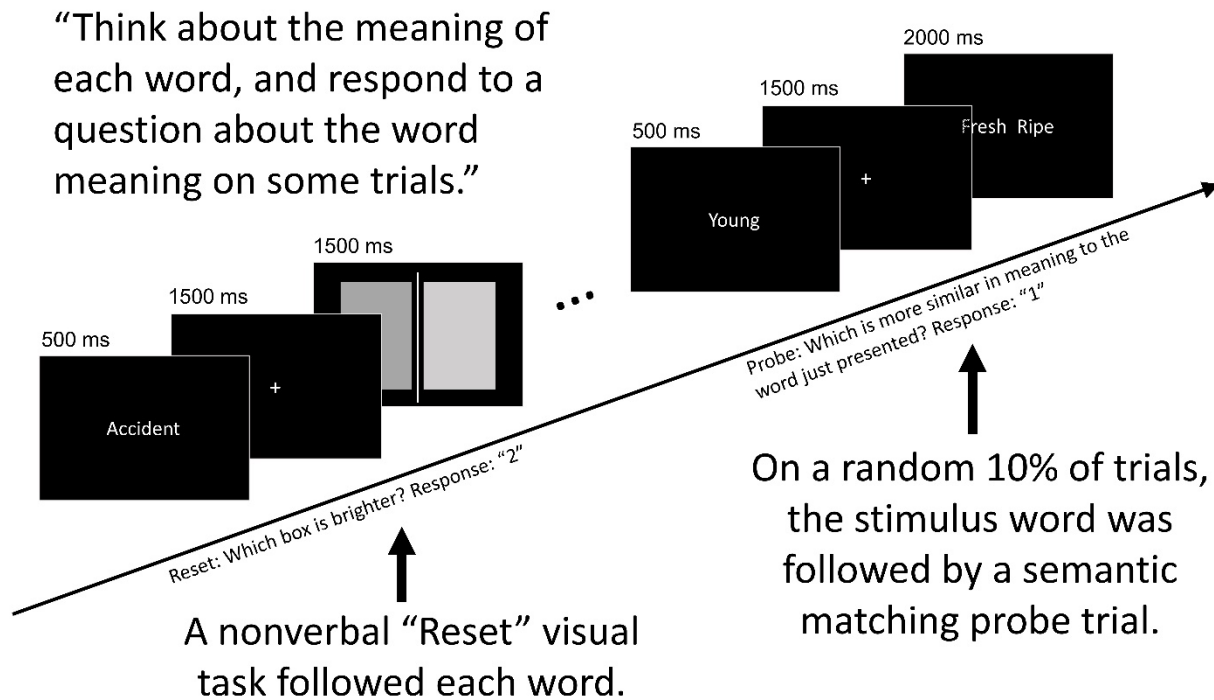

179

180 **Figure 1.** Schematic illustration of the tasks used in Experiment 1.

181

182 Each presentation of 242 test words and 26 probe trials (268 trials in total) occurred over  
183 the course of four imaging runs, each lasting 6 minutes. The four runs that comprised one  
184 repeat of the entire list was referred to as a “set”. To minimize lexical ambiguity, grammatical  
185 class was used to block items by run. This was necessary because many of the nouns in the list  
186 can also be used as verbs, and several had very different semantic features when used as  
187 nouns vs. verbs (e.g., ‘left’, ‘duck’, ‘saw’, ‘fence’, ‘spring’). Although the verbs in the set were all  
188 in past tense, several are also used commonly as adjectival participles (‘celebrated’, ‘damaged’,  
189 ‘lost’, ‘planned’, ‘used’). Thus, nouns and verbs were presented in different runs, and adjectives



190 were blocked with the nouns to separate them from the verbs. The nouns and adjectives were  
191 distributed evenly across 3 of the 4 imaging runs in each set, with the runs balanced on word  
192 class and noun category. Each of these 3 runs thus included 13 adjectives, 4-5 event nouns, 8  
193 animate object nouns, 12-13 inanimate object nouns, 12-13 human role nouns, and 10 setting  
194 nouns. The remaining run of each set contained all 62 verbs.

195 Stimuli for probe trials were selected pseudo-randomly with replacement. For the 3  
196 noun-adjective runs, a random set of either 6 or 7 probe trial words was selected for each run  
197 from the words comprising the other two noun-adjective runs, such that no stimulus used on a  
198 probe trial was repeated within the same run. This was not possible for the verb run, since all 62  
199 verbs were presented in the same run. Thus, for the verb run, 7 verbs appeared twice – one  
200 time followed by a probe and one time without a probe.

201 Nine complete sets were composed in this way. Six were selected for each participant,  
202 with counterbalancing across participants. In addition, the order of presentation within each run  
203 was randomized for each participant to eliminate order effects at the group level.

204

### 205 *MRI Data Acquisition and Processing*

206 Images were acquired with a 3T GE 750 scanner at the Center for Imaging Research of the  
207 Medical College of Wisconsin. High-resolution T1-weighted anatomical images were acquired  
208 with a 3D spoiled gradient echo sequence (FOV = 240 mm, 220 axial slices, in-plane matrix =  
209 256 x 224, voxel size = 1 x 1 x 1 mm<sup>3</sup>). T2-weighted anatomical images were acquired with a  
210 CUBE T2 sequence (FOV = 256 mm, 168 sagittal slices, in-plane matrix = 256 x 256, voxel size  
211 = 1 x 1 x 1 mm<sup>3</sup>). T2\*-weighted gradient-echo echoplanar images were obtained for functional  
212 imaging (TR = 2000 ms, TE = 24 ms, flip angle = 77°, FOV = 192 mm, 41 axial slices, in-plane  
213 matrix = 64 x 64, voxel size = 3 x 3 x 3 mm<sup>3</sup>).

214 Preprocessing was performed using AFNI. EPI images were corrected for slice timing.  
215 All images were then aligned to the 3<sup>rd</sup> functional image in the series before aligning to the T1-

216 weighted anatomical image. All voxels were normalized to have a mean of 100 and a range of 0  
217 to 200. A general linear model was built to fit the time series of the functional data via  
218 multivariable regression. Each word was treated as a single regressor of interest, which  
219 included the 6 repetitions of the word and excluded any probe task trials involving that word,  
220 resulting in 242 beta coefficient maps. Regressors of no interest included 12 degrees of  
221 freedom of head motion, response time for the reset task, and response time for the probe task  
222 trials. Individual word, reset, and probe task event regressors were convolved with a  
223 hemodynamic response function. A  $t$  statistical map was generated for each word and these  
224 maps were subsequently used for the searchlight RSA.

225

#### 226 *Surface-Based Searchlight Representational Similarity Analysis*

227 To optimize alignment between participants and to constrain the searchlight analysis to cortical  
228 grey matter, individual brain surface models were constructed from T1-weighted and T2-  
229 weighted anatomical data using Freesurfer and the HCP pipeline (Glasser et al., 2013). The  
230 cortex ribbon was reconstructed in standard grayordinate space with 2-mm spaced vertices. We  
231 visually checked the quality of reconstructed surfaces before carrying out the analysis.  
232 Segmentation errors were corrected manually, and the corrected images were fed back to the  
233 pipeline to produce the final surfaces. Only cortical grey matter was included in the analysis.

234 RSA was carried out using custom Python and Matlab scripts. Searchlight RSA typically  
235 employs spherical volumes moved systematically through the brain or the cortical grey matter  
236 voxels. This method, however, does not exclude signals from white matter voxels that happen to  
237 fall within the sphere, and which may contribute noise. Spherical volumes may also erroneously  
238 combine non-contiguous cortical regions across sulci. Surface-based searchlight analysis  
239 overcomes these shortcomings using circular 2-dimensional “patches” confined to contiguous  
240 vertices on the cortical surface. At each vertex, a fast-marching algorithm was applied to create  
241 a 5-mm radius patch around the seed vertex on the midthickness surface, resulting in a group of

242 vertices comprising each patch. These vertices were then mapped one by one back to the  
243 native volume space of the participant to label voxels associated with the surface patch. To  
244 avoid partial-volume effects, we included only voxels that contained the entire middle 80% of the  
245 cortical ribbon at the mapped vertex location. Each surface vertex was thus associated with a  
246 group of voxels in native space (the searchlight ROI) for subsequent RSA.

247 Representational dissimilarity matrices (RDMs) were calculated for the semantic model  
248 (the model RDM) and for each vertex-associated ROI (the neural RDM). Each entry in the  
249 neural RDM represented the correlation distance between fMRI responses evoked by two  
250 different words. Neural RDMs were computed for each of the 64,984 vertices. For the model  
251 RDM, we calculated the cosine distances between each pair of words in the 65-dimensional  
252 experiential feature space. A word length RDM, created by taking the absolute difference in  
253 letter length between each word pair, was included as a covariate matrix of no interest. Pearson  
254 correlations between neural RDMs and the model RDM were computed controlling for the word  
255 length RDM, resulting in a partial correlation score map on the surface for each participant.

256 Finally, second level analysis was performed on the partial correlation score maps after  
257 alignment of each individual map to a common surface template (generated by averaging the  
258 individual 32k\_FS\_LR meshes produced by the HCP pipeline), Fisher z-transformation, and  
259 smoothing of the maps with a 6-mm full width at half maximum Gaussian kernel. A one-tailed,  
260 one-sample t-test against zero was applied at all vertices. FSL's PALM was used for non-  
261 parametric permutation testing to determine cluster-level statistical inference. Cluster-level  
262 statistical inference was implemented with a cluster-forming threshold of  $z > 3.1$  ( $p < 0.001$ ).  
263 The distribution of the largest clusters across permutations, in which the correlations were  
264 randomly sign-flipped 10,000 times, was calculated, and a significance level of  $\alpha < 0.01$  was set.  
265 The final data were rendered on the group averaged HCP template surface.

266

267

## 268 **Experiment 2**

### 269 *Participants*

270 Experiment 2 involved 22 right-handed, native English speakers (11 women, 11 men; mean age  
271 29.1; range 20 to 41). None of the participants took part in Experiment 1. This dataset was  
272 reported in a previous study (Fernandino et al., 2021).

273

### 274 *Stimuli*

275 Stimuli (see Supplementary Table 2) included 160 object nouns (40 each of animals, foods,  
276 tools, and vehicles) and 160 event nouns (40 each of social events, verbal events, non-verbal  
277 sound events, and negative events). Of the 320 concepts included in Experiment 2, 24 objects  
278 and 9 events were also used in Experiment 1. Concept ratings on the same 65 experiential  
279 domains used for the model in Experiment 1 were obtained for each concept using the same  
280 crowd-sourcing methods as in Experiment 1.

281

### 282 *Stimulus Presentation and Tasks*

283 As in Experiment 1, words were presented visually in a fast event-related procedure with  
284 variable inter-stimulus intervals, and the entire list was presented 6 times in random order over  
285 three imaging sessions performed on separate days.

286 On each trial, a noun was displayed in white font on a black background for 500 ms,  
287 followed by a 2.5-second blank screen. Each trial was followed by a central fixation cross with  
288 variable duration between 1 and 3 s (mean = 1.5 s). Participants rated each noun according to  
289 how often they encountered the corresponding entity or event in their daily lives, on a scale from  
290 1 (“rarely or never”) to 3 (“often”). This familiarity judgment task was designed to encourage  
291 semantic processing of the word stimuli without emphasizing any particular semantic features or  
292 dimensions. Participants indicated their response by pressing one of three buttons on a  
293 response pad with their right hand. In contrast to Experiment 1, no reset task was used.

294 Each presentation of the 320 test words occurred over the course of 4 imaging runs.

295 Each session consisted of 2 presentations of the full list (8 runs).

296

### 297 *MRI Data Acquisition and Processing*

298 Images were acquired with a 3T GE Premier scanner at the Medical College of Wisconsin.

299 Structural imaging included a T1-weighted MPRAGE volume (FOV = 256 mm, 222 axial slices,

300 voxel size = 0.8 x 0.8 x 0.8 mm<sup>3</sup>) and a T2-weighted CUBE acquisition (FOV = 256 mm, 222

301 sagittal slices, voxel size = 0.8 x 0.8 x 0.8 mm<sup>3</sup>). T2\*-weighted gradient-echo echoplanar images

302 were obtained for functional imaging using a simultaneous multi-slice sequence (SMS factor =

303 4, TR = 1500 ms, TE = 23 ms, flip angle = 50°, FOV = 208 mm, 72 axial slices, in-plane matrix =

304 104 x 104, voxel size = 2 x 2 x 2 mm<sup>3</sup>). A pair of T2-weighted spin echo echo-planar scans (5

305 volumes each) with opposing phase-encoding directions was acquired before run 1, between

306 runs 4 and 5, and after run 8, to provide estimates of EPI geometric distortion in the phase-

307 encoding direction due to B0 inhomogeneities.

308 In addition to the preprocessing steps described above for Experiment 1, functional

309 images were also corrected for geometric distortion using AFNI's 3dQwarp, which implemented

310 non-linear transformations estimated from the paired T2-weighted spin echo images. As in

311 Experiment 1, each word was treated as a single regressor of interest and convolved with a

312 hemodynamic response function, resulting in 320 beta coefficient maps. Head motion vectors

313 were again included as regressors of no interest. Response time z-score on each trial of the

314 familiarity judgment task was also included as a covariate of no interest.

315

### 316 *Surface-Based Searchlight Representational Similarity Analysis*

317 RSA analysis, generation of group maps, and thresholding methods for Experiment 2 were

318 identical to those used for Experiment 1.

319

## 320 **Hierarchical clustering based on neural similarity structure**

321 Although the regions identified in Experiments 1 and 2 all show neural similarity structures that  
322 are correlated with the semantic model structure, it is possible that they vary somewhat in their  
323 information content. To investigate relative differences and similarities between the  
324 representational structure of the various regions identified in the RSAs, we performed  
325 hierarchical clustering analysis on the *neural* RDMs of these regions, as follows. First, the group  
326 maps from each experiment were thresholded at  $p < .0005$  to separate minimally connected  
327 regions and highlight vertices with strong correlations to the semantic model. These maps were  
328 then overlapped to identify vertices common to both experiments. These steps resulted in 23  
329 regions common to both analyses, which were used as regions of interest (ROIs) for the  
330 hierarchical clustering analysis. At the individual participant level, within each ROI, seed vertices  
331 with the highest correlation scores were combined iteratively until a set of approximately 100  
332 voxels associated with these vertices was compiled. A neural RDM was then computed for each  
333 such voxel set, resulting in 23 RDMs for each individual. Pairwise RDM correlation was  
334 calculated for these 23 voxel sets at the individual level, resulting in a new 23 x 23 matrix in  
335 which each entry represented the correlation between neural RDMs of two ROIs. These  
336 matrices were then averaged across all 41 participants, and hierarchical clustering was  
337 implemented on this averaged matrix, excluding the diagonal. Ward's variance minimization  
338 algorithm was applied to calculate distances between clusters.

339

## 340 **Results**

341 **Experiment 1.** "Probe" trials requiring semantic forced-choice matching of 2 words with the  
342 preceding list word were presented after 10% of list words to encourage attention to the list  
343 words. One participant failed to provide responses on this task, probably due to inadequate  
344 instruction. For the remaining participants, the mean response rate was 95.5% (SD 4.2%), and  
345 mean accuracy was 82.1% (SD 7.0%). A perceptual "reset" task occurred after all list words

346 (and probe trials) with the aim of curtailing processing of the previous list word. The mean  
347 response rate on this task was 98.9% (SD 2.5%), and mean accuracy was 96.1% (SD 4.6%).

348         Group-level searchlight RSA showed a bilateral, distributed network of regions where  
349 neural similarity correlated with semantic similarity across the 242 list words (**Figure 2, left**).  
350 Extensive temporal lobe involvement included much of the temporal pole, superior temporal  
351 sulcus (STS) and middle temporal gyrus (MTG), and anterior fusiform and parahippocampal gyri  
352 bilaterally. The inferior temporal gyrus (ITG) was also involved, more so on the left. Parietal lobe  
353 involvement was mainly in the inferior parietal lobule, including angular and supramarginal gyri  
354 (AG and SMG) bilaterally. Frontal lobe regions included the inferior frontal gyrus (IFG), much of  
355 the superior frontal gyrus (SFG) laterally and medially, more restricted patches in the middle  
356 frontal gyrus, and orbital frontal cortex bilaterally. Small regions of the precentral gyrus were  
357 involved in both hemispheres, and there was substantial involvement of the right insula. On the  
358 medial surface there was extensive involvement of the posterior cingulate gyrus and adjacent  
359 precuneus bilaterally, and the rostral anterior cingulate cortex bilaterally.

360

361

362

363

364

365

366

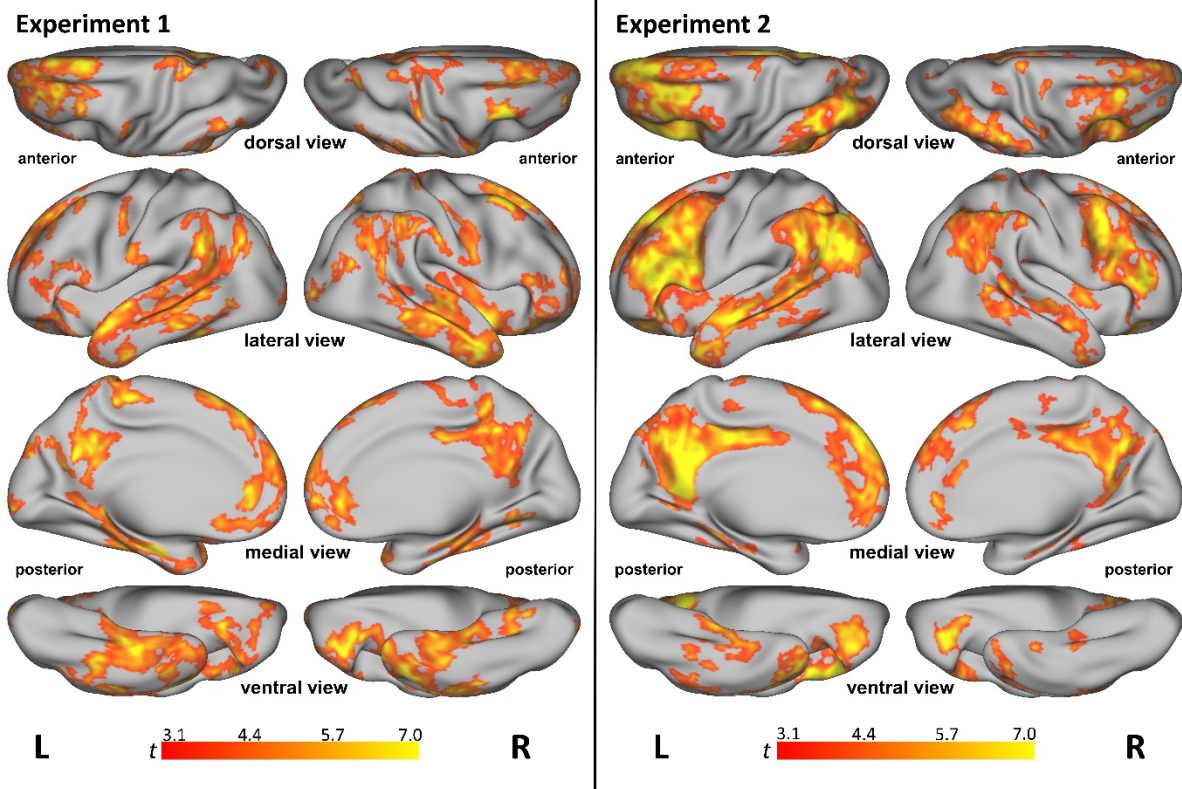

367

368 **Figure 2.** Brain areas where similarity between the neural patterns evoked by concepts was  
369 significantly correlated with concept similarity according to the semantic model. Results for  
370 Experiment 1 (left) and Experiment 2 (right) are shown on dorsal, lateral, medial, and ventral  
371 surface views. All results are significant at  $p < 0.001$  and cluster corrected at  $\alpha < 0.01$ . Colors  
372 represent t values.

373

374 **Experiment 2.** The mean response rate on the familiarity judgment task was 98.6% (SD 2.3%).  
375 Intra-individual consistency in familiarity ratings across the 6 repetitions of each word was  
376 evaluated using intraclass correlations (ICCs) based on a single measurement, two-way mixed  
377 effects model and the absolute agreement definition. Results suggested generally good overall  
378 intra-individual agreement, with individual ICCs ranging from fair to excellent (mean ICC =  
379 0.661, range: 0.438 – 0.858, all  $ps < 0.00001$ ) (Cicchetti, 1994). To examine consistency in



380 familiarity ratings across participants, responses to the 6 repetitions were first averaged within  
381 individuals, and the ICC across participants was calculated using the consistency definition.  
382 The resulting ICC of 0.595 (95% confidence interval [0.556, 0.635],  $p < .00001$ ) suggested fair  
383 to good inter-individual consistency.

384 As with Experiment 1, group-level searchlight RSA showed a bilateral, distributed  
385 network of regions where neural similarity correlated with semantic similarity across the test  
386 concepts (**Figure 1, right**). Most of these overlapped with those in Experiment 1, including  
387 temporal pole, STS, MTG, AG, SMG, IFG, SFG, and posterior cingulate/precuneus (PCC)  
388 bilaterally. Compared to Experiment 1, there was notably more extensive involvement of lateral  
389 prefrontal cortex, including inferior and middle frontal gyri, bilaterally, and somewhat less  
390 extensive ventral temporal lobe involvement. Areas of overlap between the two experiments are  
391 shown in **Figure 3**.

392

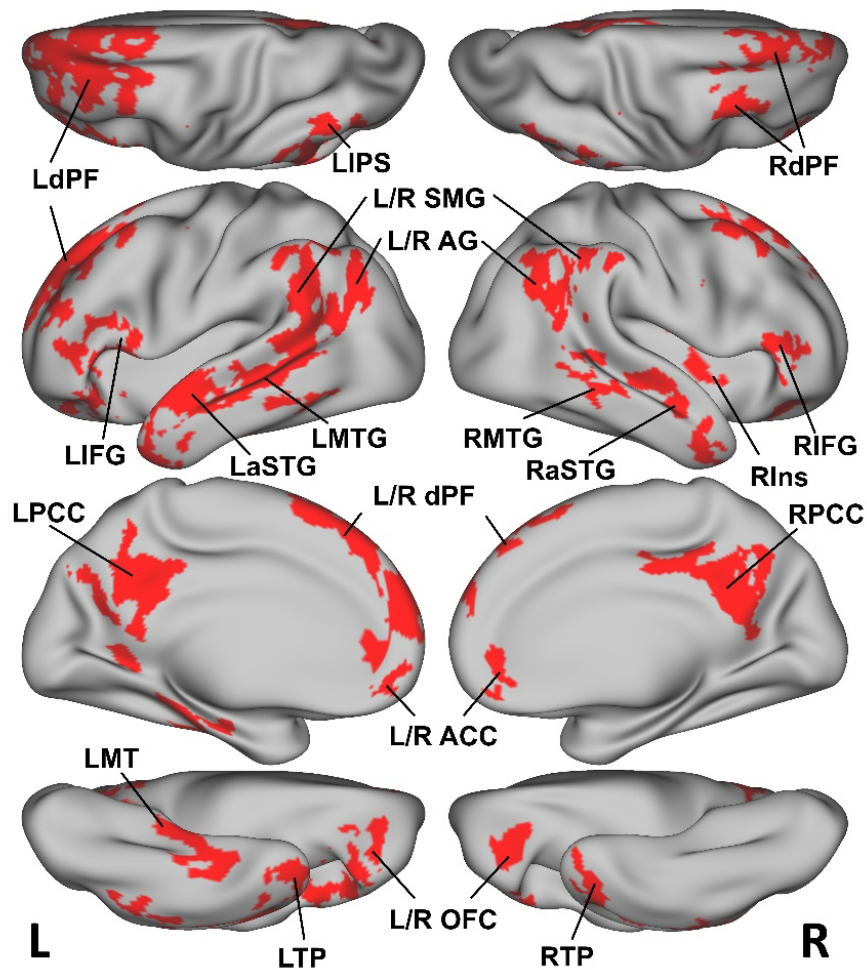

393

394 **Figure 3.** Brain areas where neural similarity was significantly correlated with model similarity in

395 both Experiment 1 and Experiment 2. LACC: left anterior cingulate cortex; LAG: left angular

396 gyrus; LaSTG: left anterior superior temporal gyrus; LdPF: left dorsal prefrontal cortex; LIFG: left

397 inferior frontal gyrus; LIPS: left intraparietal sulcus; LMT: left medial temporal lobe; LMTG: left

398 middle temporal gyrus; LOFC: left orbital frontal cortex; LPCC: left posterior cingulate and

399 precuneus cortex; LSMG: left supramarginal gyrus; LTP: left temporal pole; RAG: right angular

400 gyrus; RaSTG: right anterior superior temporal gyrus; RdPF: right dorsal prefrontal cortex;

401 RIFG: right inferior frontal gyrus; RInS: right insula; RMT: right medial temporal lobe; RMTG:

402 right middle temporal gyrus; ROFC: right orbital frontal cortex; RPCC: right posterior cingulate

403 and precuneus cortex; RSMG: right supramarginal gyrus; RTP: right temporal pole.

404

405 **Hierarchical clustering of neural similarity structures.** Overlap of the Experiment 1 and  
406 Experiment 2 RSA maps showed 23 regions common to both (color-coded in **Figure 4, right**).  
407 Degree of similarity between the neural RDMs extracted from each of these regions was  
408 examined using hierarchical cluster analysis (**Figure 4, left**). The results revealed a division  
409 between ROIs in the parietal lobe (PCC, AG, SMG, left intraparietal sulcus) and lateral temporal  
410 lobe in one major cluster, and ROIs in the medial temporal lobe, temporal pole, and frontal lobes  
411 in another major cluster. The parietal/lateral temporal cluster was further divided by hemisphere,  
412 such that right AG, SMG, MTG, and anterior STG fell in one subcluster, and left parietotemporal  
413 ROIs in another, along with left and right PCC. The other main cluster included a “limbic”  
414 subcluster consisting of bilateral temporal poles, parahippocampus/hippocampus, and right  
415 insula. A final subcluster included all frontal lobe ROIs and the left anterior STG.

416

417

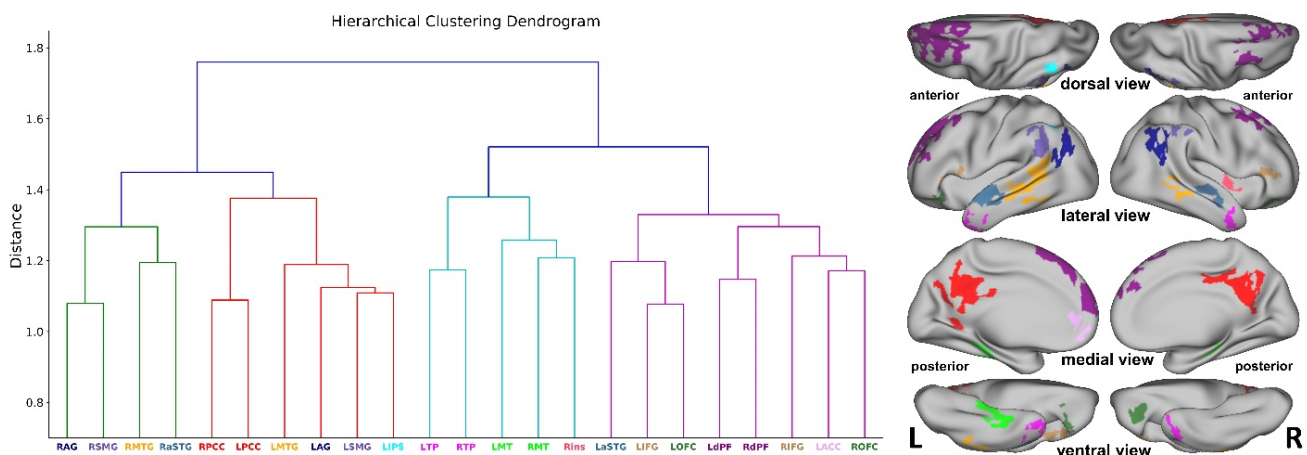

418

419 **Figure 4.** Results of hierarchical clustering of neural similarity structures. Left: Dendrogram  
420 based on the averaged similarity structures of neural data from 23 ROIs. The vertical axis  
421 indicates linkage distance. Right: The 23 ROIs defined by overlapping the RSA maps from the

422 two experiments after thresholding each map at  $p < 0.0005$  and cluster-correcting at  $\alpha < 0.01$ .

423 Anatomical labels match those in Figure 3.

424

## 425 **Discussion**

426 We sought to clarify the large-scale architecture of the concept representation system by  
427 identifying cortical regions whose activation patterns encoded multimodal experiential  
428 information about individual lexical concepts. Previous whole-brain searchlight RSA studies on  
429 this topic have used semantic representation models based on category membership, semantic  
430 feature lists, or word co-occurrence statistics, producing highly variable results. Here we used a  
431 model based entirely on multimodal experiential content with no explicit reference to taxonomic  
432 or distributional similarity. Across two independent experiments, each involving a large number  
433 and a wide range of concepts, we detected multimodal concept representation in widespread  
434 heteromodal cortical regions, bilaterally, including anterior and posterior temporal cortex, inferior  
435 parietal cortex, posterior cingulate gyrus and precuneus, and medial, dorsal, ventrolateral, and  
436 ventral prefrontal regions. These results call into question the idea that information streams  
437 originating in unimodal cortical areas are integrated at a single anatomically localized hub for  
438 concept representation.

439 Four previous RSA studies using semantic models and word stimuli implicated  
440 anteromedial temporal cortex, particularly perirhinal cortex, as a semantic hub (Devereux et al.,  
441 2013; Liuzzi et al., 2015; Martin et al., 2018; Liuzzi et al., 2019). All used semantic models  
442 based on crowd-sourced feature production lists, and all used a feature verification task during  
443 fMRI (e.g., “WASP – Does it have paws?”). Validity issues with feature production lists have  
444 been noted previously, such as the fact that many features people produce are multimodal or  
445 highly abstract, and some types of features are difficult to verbalize or systematically ignored  
446 (Hoffman and Lambon Ralph, 2013). Another potential problem with these RSA studies is that  
447 the verification task used during fMRI requires semantic processing of the explicitly named

448 feature, which logically must contribute to the observed neural activation pattern but is not  
449 coded in the semantic model. These problems may have weakened the ability of these studies  
450 to detect other regions involved in concept representation.

451         Prior studies combining searchlight RSA with either taxonomic (Devereux et al., 2013;  
452 Carota et al., 2021) or distributional (Anderson et al., 2015; Carota et al., 2021) semantic  
453 models have implicated more widespread regions, including posterior lateral temporal cortex,  
454 inferior parietal lobe, posterior cingulate gyrus, and prefrontal cortex. Only one of these studies  
455 (Anderson et al., 2015) reported any representational correspondence in medial or ventral  
456 temporal areas. The two studies using taxonomic models (Devereux et al., 2013; Carota et al.,  
457 2021) showed similar involvement of the left posterior superior temporal sulcus and MTG, with  
458 extension into adjacent AG and SMG. In contrast, the two studies using distributional models  
459 (Anderson et al., 2015; Carota et al., 2021) found little or no posterior temporal involvement, and  
460 inferior parietal involvement was confined mainly to the left SMG. Frontal cortex involvement  
461 was uniformly present but highly variable in extent and location across the studies. Two studies  
462 reported involvement of the posterior cingulate/precuneus (Devereux et al., 2013; Anderson et  
463 al., 2015).

464         Several factors may have negatively impacted sensitivity and reliability in these studies.  
465 First, ROI-based RSAs show that, relative to experiential models of concept representation,  
466 taxonomic and distributional models are consistently less sensitive to the neural similarity  
467 structure of lexical concepts (Fernandino et al., 2021). Furthermore, most of the prior studies  
468 used volume-based spherical searchlights, which typically sample a mix of grey and white  
469 matter voxels, while the surface-based approach used in the present study ensures that only  
470 contiguous cortical gray matter voxels are included, thus reducing noise from uninformative  
471 voxels. Finally, the nature of the task and the particularities of the concept set used as stimuli  
472 can affect both the sensitivity of the analysis and the cortical distribution of the RSA searchlight  
473 map, and variations in these properties may underlie some of the variation in results across

474 studies. We dealt with this issue by (1) employing large numbers of concepts from diverse  
475 semantic categories and (2) by analyzing data from two independent experiments to identify  
476 areas displaying reliable representational correspondence with the semantic model across  
477 different concept sets and different tasks.

478         The network of brain regions identified in the current study closely resembles the  
479 network identified previously in a meta-analysis of 120 functional imaging studies on semantic  
480 processing (Binder et al., 2009). The results provide novel evidence that these brain regions,  
481 consisting essentially of heteromodal association areas distant from primary sensory and motor  
482 systems, represent conceptual information in terms of multimodal experiential content. In  
483 contrast to previous RSA studies of concept representation (Devereux et al., 2013; Anderson et  
484 al., 2015; Martin et al., 2018; Carota et al., 2021), the network includes extensive cortex in the  
485 ATL, a region strongly implicated in high-level semantic representation (Lambon Ralph et al.,  
486 2017). Although the current results support a role for the ATL in concept representation, they  
487 argue against it having a unique role as a central integration hub.

488         The concept representation network identified in the current study also closely  
489 resembles the set of brain regions referred to as the “default mode network” (Buckner et al.,  
490 2008). This overlap supports the view that concept retrieval and manipulation are major  
491 components of the brain’s “default mode” of processing (Binder et al., 1999; Binder et al., 2009;  
492 Andrews-Hanna et al., 2014). Our results add to prior evidence by showing that the  
493 representational structure of neural activity in these regions reflects the experiential content of  
494 lexical concepts.

495         The finding of extensive frontal lobe involvement in concept “representation” deserves  
496 comment. Studies of brain damaged individuals and functional imaging experiments in the  
497 healthy brain have long been interpreted as supporting the classic view that frontal cortex plays  
498 an operational control rather than an information storage function in the brain (Stuss and  
499 Benson, 1986; Kimberg and Farah, 1993; Thompson-Schill et al., 1997; Wagner et al., 2001).

500 Nevertheless, nearly all RSA studies of concept representation have observed similarity  
501 structure correlations in prefrontal regions. Why would activity in these areas reflect semantic  
502 content? We believe these observations can be reconciled with the classic view by postulating a  
503 more fine-grained organization of control systems in the frontal lobe than is usually assumed in  
504 semantic theories. Rather than being composed of large, homogeneous areas with a  
505 nonspecific control function, control systems in the prefrontal cortex may be tuned, at a  
506 relatively small scale, to particular sensory-motor and affective features. Neurophysiological  
507 studies in nonhuman primates provide evidence for tuning of prefrontal neurons to preferred  
508 stimulus modalities (Romanski, 2007), as well as differential connectivity across the prefrontal  
509 cortex with various sensory systems (Barbas and Mesulam, 1981; Petrides, 2005). A few  
510 human functional imaging studies provide similar evidence for sensory modality tuning in  
511 prefrontal cortex (Greenberg et al., 2010; Michalka et al., 2015; Tobyne et al., 2017). If  
512 conceptual representation in temporal and parietal cortex is inherently organized according to  
513 experiential content, it seems plausible that controlled activation and short-term maintenance of  
514 this information would require similarly fine-grained control mechanisms.

515         This hypothesis finds some support in a comparison of our two experiments. The  
516 infrequent probe task procedure used in Experiment 1 was intentionally designed to minimize  
517 explicit, goal-directed retrieval of semantic information, and the inclusion of a non-semantic  
518 perceptual discrimination task after each trial likely encouraged participants to focus their  
519 attention on this task rather than on semantic retrieval. In contrast, the task in Experiment 2  
520 required participants to make a semantic decision about each word. Compared to Experiment 1,  
521 the Experiment 2 results show much more extensive involvement of lateral prefrontal cortex. A  
522 likely interpretation is that the explicit task in Experiment 2 led to stronger engagement of  
523 feature-specific control networks in these frontal regions. We propose that the information  
524 represented in these prefrontal regions reflects their entrainment to experiential representations

525 stored primarily in temporoparietal cortex, providing context-dependent control over their level of  
526 activation.

527         Related to this issue is the question of how similar the many regions identified by RSA  
528 are to each other in terms of their representational structure. Although RSA ensures that the  
529 neural similarity structure of all these regions is related to the similarity structure encoded in the  
530 semantic model, representational structure should be expected to vary to some degree across  
531 distinct functional regions. An exploratory cluster analysis of the neural RDMs from these  
532 regions suggests a broad distinction between two clusters, one consisting of medial and lateral  
533 parietal cortex and posterior lateral temporal areas (across both hemispheres) and the other  
534 consisting of medial, ventral, and anterior temporal areas, right insula, and frontal areas. There  
535 was also evidence for a distinction between left and right parietotemporal representational  
536 structures. These results are consistent with proposed distinctions between the functions of  
537 frontal, posterior association, and limbic cortices, as well as longstanding claims regarding  
538 interhemispheric differences in semantic representation (Beeman and Chiarello, 1998).  
539 Interestingly, this analysis suggests that representations in the ATL are more similar to those in  
540 prefrontal areas than to those in posterior temporal and parietal areas involved in the  
541 representation of objects and events (Martin, 2007; Bedny et al., 2014). More research is  
542 needed to understand the factors that underlie these regional differences in representational  
543 content.

544



545 **References**

- 546 Andersen RA (1997) Multimodal integration for the representation of space in the posterior parietal  
547 cortex. *Philos Trans R Soc Lond B Biol Sci* 352:1421-1428.
- 548 Anderson AJ, Bruni E, Lopopolo A, Poesio M, Baroni M (2015) Reading visually embodied meaning from  
549 the brain: Visually grounded computational models decode visual-object mental imagery  
550 induced by written text. *Neuroimage* 120:309-322.
- 551 Anderson AJ, Binder JR, Fernandino L, Humphries CJ, Conant LL, Raizada RDS, Lin F, Lalor EC (2019) An  
552 integrated neural decoder of linguistic and experiential meaning. *J Neurosci* 39:8969-8987.
- 553 Anderson AJ, Binder JR, Fernandino L, Humphries CJ, Conant LL, Aguilar M, Wang X, Doko D, Raizada RDS  
554 (2017) Predicting neural activity patterns associated with sentences using a neurobiologically  
555 motivated model of semantic representation. *Cereb Cortex* 27:4379-4395.
- 556 Andrews-Hanna JR, Smallwood J, Spreng RN (2014) The default network and self-generated thought:  
557 Component processes, dynamic control, and clinical relevance. *Ann N Y Acad Sci* 1316:29-52.
- 558 Barbas H, Mesulam MM (1981) Organization of afferent input to subdivisions of area 8 in the rhesus  
559 monkey. *J Comp Neurol* 200:407-431.
- 560 Barsalou LW (2008) Grounded cognition. *Annu Rev Psychol* 59:617-645.
- 561 Beauchamp MS, Yasar NE, Frye RE, Ro T (2008) Touch, sound and vision in human superior temporal  
562 sulcus. *Neuroimage* 41:1011-1020.
- 563 Bedny M, Dravida S, Saxe R (2014) Shindigs, brunches, and rodeos: The neural basis of event words.  
564 *Cogn Affect Behav Neurosci* 14:891-901.
- 565 Beeman M, Chiarello C (1998) Right hemisphere language comprehension: Perspectives from cognitive  
566 neuroscience: Psychology Press.
- 567 Binder JR, Desai RH (2011) The neurobiology of semantic memory. *Trends Cogn Sci* 15:527-536.

- 568 Binder JR, Desai RH, Graves WW, Conant LL (2009) Where is the semantic system? A critical review and  
569 meta-analysis of 120 functional neuroimaging studies. *Cereb Cortex* 19:2767-2796.
- 570 Binder JR, Frost JA, Hammeke TA, Bellgowan PS, Rao SM, Cox RW (1999) Conceptual processing during  
571 the conscious resting state. A functional MRI study. *J Cogn Neurosci* 11:80-95.
- 572 Binder JR, Conant LL, Humphries CJ, Fernandino L, Simons SB, Aguilar M, Desai RH (2016) Toward a  
573 brain-based componential semantic representation. *Cogn Neuropsychol* 33:130-174.
- 574 Bonner MF, Peelle JE, Cook PA, Grossman M (2013) Heteromodal conceptual processing in the angular  
575 gyrus. *Neuroimage* 71:175-186.
- 576 Bruce C, Desimone R, Gross CG (1981) Visual properties of neurons in a polysensory area in superior  
577 temporal sulcus of the macaque. *J Neurophysiol* 46:369-384.
- 578 Buckner RL, Andrews-Hanna JR, Schacter DL (2008) The brain's default network: Anatomy, function, and  
579 relevance to disease. *Ann N Y Acad Sci* 1124:1-38.
- 580 Carota F, Nili H, Pulvermuller F, Kriegeskorte N (2021) Distinct fronto-temporal substrates of  
581 distributional and taxonomic similarity among words: Evidence from rsa of bold signals.  
582 *Neuroimage* 224:117408.
- 583 Damasio AR (1989) Time-locked multiregional retroactivation: A systems-level proposal for the neural  
584 substrates of recall and recognition. *Cognition* 33:25-62.
- 585 Damasio AR, Damasio H, Van Hoesen GW (1982) Prosopagnosia: Anatomic basis and behavioral  
586 mechanisms. *Neurology* 32:331-341.
- 587 Devereux BJ, Clarke A, Marouchos A, Tyler LK (2013) Representational similarity analysis reveals  
588 commonalities and differences in the semantic processing of words and objects. *J Neurosci*  
589 33:18906-18916.
- 590 Fernandino L, Conant LL, Humphries CJ, Binder JR (2021) Decoding the information structure underlying  
591 the neural representation of concepts. *bioRxiv:2021.2003.2016.435524*.

- 592 Fernandino L, Humphries CJ, Conant LL, Seidenberg MS, Binder JR (2016a) Heteromodal cortical areas  
593 encode sensory-motor features of word meaning. *J Neurosci* 36:9763-9769.
- 594 Fernandino L, Binder JR, Desai RH, Pendl SL, Humphries CJ, Gross WL, Conant LL, Seidenberg MS (2016b)  
595 Concept representation reflects multimodal abstraction: A framework for embodied semantics.  
596 *Cereb Cortex* 26:2018-2034.
- 597 Glasser MF, Sotiropoulos SN, Wilson JA, Coalson TS, Fischl B, Andersson JL, Xu J, Jbabdi S, Webster M,  
598 Polimeni JR, Van Essen DC, Jenkinson M, Consortium WU-MH (2013) The minimal preprocessing  
599 pipelines for the human connectome project. *Neuroimage* 80:105-124.
- 600 Glenberg AM, Webster BJ, Mouilso E, Havas D, Lindeman LM (2009) Gender, emotion, and the  
601 embodiment of language comprehension. *1*:151-161.
- 602 Greenberg AS, Esterman M, Wilson D, Serences JT, Yantis S (2010) Control of spatial and feature-based  
603 attention in frontoparietal cortex. *J Neurosci* 30:14330-14339.
- 604 Hoffman P, Lambon Ralph MA (2013) Shapes, scents and sounds: Quantifying the full multi-sensory basis  
605 of conceptual knowledge. *Neuropsychologia* 51:14-25.
- 606 Jones EG, Powell TP (1970) An anatomical study of converging sensory pathways within the cerebral  
607 cortex of the monkey. *Brain* 93:793-820.
- 608 Kemmerer DL (2014) *Cognitive neuroscience of language*. New York, NY: Psychology Press.
- 609 Kiefer M, Pulvermuller F (2012) Conceptual representations in mind and brain: Theoretical  
610 developments, current evidence and future directions. *Cortex* 48:805-825.
- 611 Kimberg DY, Farah MJ (1993) A unified account of cognitive impairments following frontal lobe damage:  
612 The role of working memory in complex, organized behavior. *J Exp Psychol Gen* 122:411-428.
- 613 Kriegeskorte N, Mur M, Bandettini P (2008) Representational similarity analysis - connecting the  
614 branches of systems neuroscience. *Front Syst Neurosci* 2:4.

- 615 Lambon Ralph MA, Jefferies E, Patterson K, Rogers TT (2017) The neural and computational bases of  
616 semantic cognition. *Nat Rev Neurosci* 18:42-55.
- 617 Liuzzi AG, Dupont P, Peeters R, Bruffaerts R, De Deyne S, Storms G, Vandenberghe R (2019) Left  
618 perirhinal cortex codes for semantic similarity between written words defined from cued word  
619 association. *Neuroimage* 191:127-139.
- 620 Liuzzi AG, Bruffaerts R, Dupont P, Adamczuk K, Peeters R, De Deyne S, Storms G, Vandenberghe R (2015)  
621 Left perirhinal cortex codes for similarity in meaning between written words: Comparison with  
622 auditory word input. *Neuropsychologia* 76:4-16.
- 623 Mahon BZ, Caramazza A (2008) A critical look at the embodied cognition hypothesis and a new proposal  
624 for grounding conceptual content. *J Physiol Paris* 102:59-70.
- 625 Man K, Kaplan J, Damasio H, Damasio A (2013) Neural convergence and divergence in the mammalian  
626 cerebral cortex: From experimental neuroanatomy to functional neuroimaging. *J Comp Neurol*  
627 521:4097-4111.
- 628 Man K, Damasio A, Meyer K, Kaplan JT (2015) Convergent and invariant object representations for sight,  
629 sound, and touch. *Hum Brain Mapp* 36:3629-3640.
- 630 Martin A (2007) The representation of object concepts in the brain. *Annu Rev Psychol* 58:25-45.
- 631 Martin CB, Douglas D, Newsome RN, Man LL, Barense MD (2018) Integrative and distinctive coding of  
632 visual and conceptual object features in the ventral visual stream. *Elife* 7.
- 633 Mesulam MM (1998) From sensation to cognition. *Brain* 121 ( Pt 6):1013-1052.
- 634 Meteyard L, Vigliocco G (2008) 15 - the role of sensory and motor information in semantic  
635 representation: A review. In: *Handbook of cognitive science* (Calvo P, Gomila A, eds), pp 291-  
636 312. San Diego: Elsevier.
- 637 Meyer K, Damasio A (2009) Convergence and divergence in a neural architecture for recognition and  
638 memory. *Trends Neurosci* 32:376-382.

- 639 Michalka SW, Kong L, Rosen ML, Shinn-Cunningham BG, Somers DC (2015) Short-term memory for space  
640 and time flexibly recruit complementary sensory-biased frontal lobe attention networks. *Neuron*  
641 87:882-892.
- 642 Oldfield RC (1971) The assessment and analysis of handedness: The edinburgh inventory.  
643 *Neuropsychologia* 9:97-113.
- 644 Padberg J, Seltzer B, Cusick CG (2003) Architectonics and cortical connections of the upper bank of the  
645 superior temporal sulcus in the rhesus monkey: An analysis in the tangential plane. *J Comp*  
646 *Neurol* 467:418-434.
- 647 Patterson K, Nestor PJ, Rogers TT (2007) Where do you know what you know? The representation of  
648 semantic knowledge in the human brain. *Nat Rev Neurosci* 8:976-987.
- 649 Petrides M (2005) Lateral prefrontal cortex: Architectonic and functional organization. *Philos Trans R Soc*  
650 *Lond B Biol Sci* 360:781-795.
- 651 Romanski LM (2007) Representation and integration of auditory and visual stimuli in the primate ventral  
652 lateral prefrontal cortex. *Cereb Cortex* 17 Suppl 1:i61-69.
- 653 Sepulcre J, Sabuncu MR, Yeo TB, Liu H, Johnson KA (2012) Stepwise connectivity of the modal cortex  
654 reveals the multimodal organization of the human brain. *J Neurosci* 32:10649-10661.
- 655 Stuss DT, Benson DF (1986) *The frontal lobes*. New York: Raven Press.
- 656 Sugihara T, Diltz MD, Averbek BB, Romanski LM (2006) Integration of auditory and visual  
657 communication information in the primate ventrolateral prefrontal cortex. *J Neurosci* 26:11138-  
658 11147.
- 659 Thompson-Schill SL, D'Esposito M, Aguirre GK, Farah MJ (1997) Role of left inferior prefrontal cortex in  
660 retrieval of semantic knowledge: A reevaluation. *Proc Natl Acad Sci U S A* 94:14792-14797.
- 661 Tobyne SM, Osher DE, Michalka SW, Somers DC (2017) Sensory-biased attention networks in human  
662 lateral frontal cortex revealed by intrinsic functional connectivity. *Neuroimage* 162:362-372.

- 663 Van Hoesen GW, Pandya DN, Butters N (1972) Cortical afferents to the entorhinal cortex of the rhesus  
664 monkey. *Science* 175:1471-1473.
- 665 Wagner AD, Pare-Blagoev EJ, Clark J, Poldrack RA (2001) Recovering meaning: Left prefrontal cortex  
666 guides controlled semantic retrieval. *Neuron* 31:329-338.
- 667

668 **Figure Legends**

669

670 **Figure 1.** Schematic illustration of the tasks used in Experiment 1.

671

672 **Figure 2.** Brain areas where similarity between the neural patterns evoked by concepts was  
673 significantly correlated with concept similarity according to the semantic model. Results for  
674 Experiment 1 (left) and Experiment 2 (right) are shown on dorsal, lateral, medial, and ventral  
675 surface views. All results are significant at  $p < 0.001$  and cluster corrected at  $\alpha < 0.01$ . Colors  
676 represent t values.

677

678 **Figure 3.** Brain areas where neural similarity was significantly correlated with model similarity in  
679 both Experiment 1 and Experiment 2. LACC: left anterior cingulate cortex; LAG: left angular  
680 gyrus; LaSTG: left anterior superior temporal gyrus; LdPF: left dorsal prefrontal cortex; LIFG: left  
681 inferior frontal gyrus; LIPS: left intraparietal sulcus; LMT: left medial temporal lobe; LMTG: left  
682 middle temporal gyrus; LOFC: left orbital frontal cortex; LPCC: left posterior cingulate and  
683 precuneus cortex; LSMG: left supramarginal gyrus; LTP: left temporal pole; RAG: right angular  
684 gyrus; RaSTG: right anterior superior temporal gyrus; RdPF: right dorsal prefrontal cortex;  
685 RIFG: right inferior frontal gyrus; RIns: right insula; RMT: right medial temporal lobe; RMTG:  
686 right middle temporal gyrus; ROFC: right orbital frontal cortex; RPCC: right posterior cingulate  
687 and precuneus cortex; RSMG: right supramarginal gyrus; RTP: right temporal pole.

688

689 **Figure 4.** Results of hierarchical clustering of neural similarity structures. Left: Dendrogram  
690 based on the averaged similarity structures of neural data from 23 ROIs. The vertical axis  
691 indicates linkage distance. Right: The 23 ROIs defined by overlapping the RSA maps from the  
692 two experiments after thresholding each map at  $p < 0.0005$  and cluster-correcting at  $\alpha < 0.01$ .  
693 Anatomical labels match those in Figure 3.

694 **Supplementary Materials**

695

| Adjective  |           | Verb        |            | Noun        |           |            |            |            |
|------------|-----------|-------------|------------|-------------|-----------|------------|------------|------------|
| aggressive | soft      | approached  | left       | accident    | coffee    | flower     | office     | team       |
| angry      | spiritual | arrested    | liked      | activist    | commander | football   | parent     | television |
| big        | tired     | ate         | listened   | actor       | company   | forest     | park       | terrorist  |
| black      | used      | blocked     | lived      | agreement   | computer  | girl       | party      | theater    |
| blue       | wealthy   | bought      | lost       | airport     | corn      | glass      | patient    | ticket     |
| clever     | white     | broke       | marched    | army        | council   | guard      | pencil     | tourist    |
| cold       | yellow    | built       | met        | artist      | couple    | hall       | pilot      | tree       |
| dangerous  | young     | carried     | negotiated | author      | court     | highway    | plane      | trial      |
| dark       |           | celebrated  | opened     | ball        | criminal  | horse      | policeman  | vacation   |
| dead       |           | crossed     | planned    | banker      | debate    | hospital   | politician | victim     |
| dusty      |           | damaged     | played     | baseball    | desk      | hotel      | priest     | voter      |
| empty      |           | delivered   | put        | beach       | dime      | hurricane  | prison     | water      |
| expensive  |           | destroyed   | ran        | bed         | dinner    | island     | protest    | window     |
| famous     |           | drank       | read       | bicycle     | diplomat  | journalist | reporter   | winter     |
| friendly   |           | drew        | saw        | bird        | doctor    | judge      | restaurant | witness    |
| green      |           | dropped     | shouted    | boat        | dog       | jury       | river      | woman      |
| happy      |           | ended       | slept      | book        | door      | lab        | school     | worker     |
| heavy      |           | feared      | spoke      | boy         | driver    | lake       | scientist  |            |
| hot        |           | fed         | stayed     | bread       | duck      | lawyer     | soccer     |            |
| injured    |           | fixed       | stole      | bridge      | editor    | magazine   | soldier    |            |
| lonely     |           | flew        | survived   | businessman | egg       | man        | spring     |            |
| long       |           | found       | threw      | cabinet     | election  | mayor      | stone      |            |
| loud       |           | gave        | took       | camera      | embassy   | medicine   | store      |            |
| new        |           | grew        | used       | car         | engineer  | meeting    | storm      |            |
| old        |           | held        | visited    | cash        | family    | minister   | street     |            |
| peaceful   |           | helped      | walked     | cellphone   | farmer    | mob        | student    |            |
| powerful   |           | hiked       | wanted     | chair       | feather   | morning    | summer     |            |
| red        |           | interviewed | watched    | chicken     | fence     | mountain   | sun        |            |
| shiny      |           | kicked      | went       | child       | field     | mouse      | table      |            |
| sick       |           | landed      | worked     | church      | fish      | newspaper  | tea        |            |
| small      |           | laughed     | wrote      | cloud       | flood     | night      | teacher    |            |

696 **Supplementary table. 1. Words for experiment 1**

697



698

| Event        |               |              |               | Object       |            |             |             |
|--------------|---------------|--------------|---------------|--------------|------------|-------------|-------------|
| Negative     | Nonverbal     | Social       | Verbal        | Animal       | Food/Plant | Tool        | Vehicle     |
| avalanche    | chuckle       | bash         | lecture       | hippopotamus | chestnut   | scissors    | ferry       |
| battle       | squeal        | parade       | eulogy        | fish         | ketchup    | dime        | ambulance   |
| blizzard     | screaming     | conference   | tribute       | ant          | cranberry  | candle      | train       |
| bombing      | sizzle        | rally        | deposition    | goldfish     | flower     | stapler     | automobile  |
| brawl        | screeching    | party        | showdown      | turtle       | raspberry  | rake        | boat        |
| cyclone      | applause      | tournament   | protest       | tiger        | custard    | spatula     | bobsled     |
| downpour     | siren         | gathering    | compliment    | jackal       | sauerkraut | umbrella    | skateboard  |
| drought      | crescendo     | musical      | greeting      | cricket      | mushroom   | axe         | carriage    |
| earthquake   | snap          | cruise       | testimony     | butterfly    | pudding    | crutches    | helicopter  |
| epidemic     | growling      | wedding      | discourse     | mosquito     | ham        | comb        | barge       |
| explosion    | sneeze        | convention   | praise        | chameleon    | honey      | tongs       | tricycle    |
| famine       | boom          | circus       | rebuke        | horse        | lemonade   | anchor      | wagon       |
| flood        | thumping      | pageant      | rebuttal      | salmon       | tomato     | ladle       | sled        |
| gunshot      | shrieking     | luncheon     | dispute       | alligator    | chocolate  | sandpaper   | motorcycle  |
| gust         | sobbing       | outing       | comment       | trout        | banana     | book        | jeep        |
| hail         | clattering    | jubilee      | commemoration | chimpanzee   | cider      | faucet      | van         |
| hailstorm    | gulp          | expo         | denial        | chicken      | broccoli   | pencil      | bus         |
| hurricane    | whine         | reception    | trial         | duck         | pumpkin    | glass       | plane       |
| inferno      | whimpering    | banquet      | huddle        | baboon       | bread      | hoe         | tractor     |
| invasion     | melody        | reunion      | advice        | lion         | cheese     | fork        | steamer     |
| landslide    | hiccup        | dance        | quarrel       | mouse        | champagne  | camera      | car         |
| lightning    | murmuring     | feast        | thanks        | caterpillar  | spaghetti  | binoculars  | rowboat     |
| monsoon      | roaring       | safari       | interrogation | hawk         | eggplant   | straw       | taxi        |
| murder       | sigh          | celebration  | joke          | moose        | dandelion  | calculator  | convertible |
| outbreak     | squeaking     | fair         | plea          | snake        | egg        | stethoscope | streetcar   |
| plague       | wheezing      | expedition   | class         | octopus      | pineapple  | corkscrew   | limousine   |
| raid         | rumble        | concert      | recitation    | dog          | cucumber   | cash        | glider      |
| riot         | bang          | symphony     | dictation     | hamster      | milk       | handsaw     | truck       |
| shooting     | giggle        | cookout      | debate        | cardinal     | mustard    | magazine    | rocket      |
| squall       | reverberation | contest      | sermon        | penguin      | tobacco    | football    | canoe       |
| stampede     | crackle       | carnival     | rant          | whale        | bean       | microscope  | locomotive  |
| storm        | rustle        | festival     | lesson        | crow         | jam        | hammer      | trolley     |
| tempest      | thunderclap   | housewarming | threat        | turkey       | blueberry  | thermometer | bicycle     |
| thunderstorm | jingle        | fiesta       | wisecrack     | elephant     | asparagus  | baseball    | sleigh      |
| tornado      | clapping      | march        | grievance     | bison        | nectarine  | keyboard    | subway      |
| twister      | chattering    | christening  | complaint     | cheetah      | coffee     | key         | escalator   |
| volcano      | bellowing     | prom         | apology       | rhinoceros   | beer       | ticket      | sailboat    |
| war          | grunt         | cocktails    | commentary    | chipmunk     | cherry     | newspaper   | elevator    |
| whirlwind    | laughter      | picnic       | meeting       | monkey       | plant      | hairbrush   | submarine   |
| wildfire     | groaning      | tour         | squabble      | dolphin      | carrot     | skillet     | scooter     |

699 **Supplementary table. 2. Words for experiment 2**
